# Supplementary material for: Obesity, low levels of physical activity and smoking present opportunities for primary care asthma interventions: an analysis of baseline data from The Asthma Tools Study
Source: PubMed Central journal article supplement (PMC4590305; doi:10.1038/npjpcrm.2015.58), 2015-10-01
Supplement: npjpcrm201558-s3.pdf [file npjpcrm201558-s3.pdf]

Supplementary Figure 1

|                                                                                                                                                  |                                        |                                                                                                             |
|--------------------------------------------------------------------------------------------------------------------------------------------------|----------------------------------------|-------------------------------------------------------------------------------------------------------------|
| <p><b>A</b>= Activities<br/> <b>P</b>=Persistent<br/> <b>G</b>=triGGers<br/> <b>A</b>= Asthma medications<br/> <b>R</b>= Response to therapy</p> | <h2 style="margin: 0;">APGAR PLUS</h2> | <p><b>P</b>=Asthma Plan<br/> <b>L</b>=Lung function<br/> <b>U</b>=Use of inhaler<br/> <b>S</b>=Steroids</p> |
|--------------------------------------------------------------------------------------------------------------------------------------------------|----------------------------------------|-------------------------------------------------------------------------------------------------------------|

*Please circle your answers:*

**A** 1. In the past 2 weeks, how many times did any breathing problems (such as asthma) interfere with your **ACTIVITIES** or activities you wanted to do?

Never                      1 – 2 times                      3 or more times

**P** 2. How many **DAYS** in the past 2 weeks did you have shortness of breath, wheezing, chest tightness, cough or felt you should use your rescue inhaler?

None                      1 - 2 DAYS                      3 or more DAYS

3. How many **NIGHTS** in the past 2 weeks did you wake up or have trouble sleeping due to coughing, shortness of breath, wheezing, chest tightness or get up to use your rescue medication?

None                      1 - 2 NIGHTS                      3 or more NIGHTS

**G** 4. Do you know what makes your breathing problems or asthma worse?

Yes                      No                      Unsure

- Please circle things that make your breathing problems or asthma worse:  
Cigarettes    Smoke    Cold Air    Colds    Exercise    Dust    Dust Mites  
Trees    Flowers    Cats    Dogs    Mold    Other: \_\_\_\_\_
- Can you avoid the things that make your breathing problems or asthma worse?  
Seldom                      Sometimes                      Most of the time

**A** 5. List or describe medications you've taken for breathing problems or asthma in the past 2 weeks: Remember you may use Nasal, Oral, or Inhaler medications.

| Breathing or Asthma Medication | When taken?                    |                                    | Reasons for taking medication: | Reasons for not taking medication: |
|--------------------------------|--------------------------------|------------------------------------|--------------------------------|------------------------------------|
|                                | <input type="checkbox"/> Daily | <input type="checkbox"/> As needed |                                |                                    |
|                                | <input type="checkbox"/> Daily | <input type="checkbox"/> As needed |                                |                                    |
|                                | <input type="checkbox"/> Daily | <input type="checkbox"/> As needed |                                |                                    |
|                                | <input type="checkbox"/> Daily | <input type="checkbox"/> As needed |                                |                                    |

**R** 6. When I use my breathing or asthma medicines I feel:

Worse                      No Different                      A Little Better                      A Lot Better
